# Supplementary material for: Long Noncoding RNA CCAT2 as a Potential Novel Biomarker to Predict the Clinical Outcome of Cancer Patients: A Meta-Analysis
Source: PubMed Central journal article supplement — J Cancer. 2017 Jun 1;8(8):1498–506. doi: 10.7150/jca.18626 (PMC5479257; doi:10.7150/jca.18626), 2017-06-01
Supplement: jcav08p1498s1.pdf [file jcav08p1498s1.pdf]

**Table S1. Newcastle-Ottawa Scale for assessment of quality of included case-control studies**

| Author | Country | Adequacy of case definition | Representativeness of the cases | Selection of controls | Definition of controls | Comparability | Ascertainment of exposure | Same method of ascertainment | Nonresponse rate |
|--------|---------|-----------------------------|---------------------------------|-----------------------|------------------------|---------------|---------------------------|------------------------------|------------------|
| Zheng  | China   | *                           | *                               | *                     | NA                     | **            | *                         | *                            | NA               |
| Cai    | China   | *                           | *                               | *                     | NA                     | **            | *                         | *                            | NA               |
| Chen   | China   | *                           | *                               | *                     | NA                     | **            | *                         | *                            | NA               |
| Huang  | China   | *                           | *                               | *                     | NA                     | **            | *                         | *                            | NA               |
| Wang   | China   | *                           | *                               | *                     | NA                     | **            | *                         | *                            | NA               |
| Chen   | China   | *                           | *                               | *                     | NA                     | **            | *                         | *                            | NA               |
| Li     | China   | *                           | *                               | *                     | NA                     | **            | *                         | *                            | NA               |
| Zhang  | China   | *                           | *                               | *                     | NA                     | **            | *                         | *                            | NA               |

Notes: This table identifies “high-quality” choices with a “\*”. One study can be awarded a maximum of one “\*” for each numbered item within the selection and exposure categories. A maximum of two “\*” can be given for comparability. NA: not available.

**Table S2. Search strategy used in PubMed**

| No. | Query Results                                                                                                                                         | Results | Date             |
|-----|-------------------------------------------------------------------------------------------------------------------------------------------------------|---------|------------------|
| #1  | "long non-coding RNA CCAT2, human"[Mesh]                                                                                                              | 4       | 09 November 2016 |
| #2  | "CCAT2" [Title/Abstract] OR "colon cancer-associated transcript 2" [Title/Abstract]                                                                   | 18      | 09 November 2016 |
| #3  | #1 OR #2                                                                                                                                              | 18      | 09 November 2016 |
| #4  | "Neoplasms"[Mesh]                                                                                                                                     | 2844031 | 09 November 2016 |
| #5  | "cancer" [Title/Abstract] OR "carcinoma*" [Title/Abstract] OR "tumor*" [Title/Abstract] OR "tumour*" [Title/Abstract] OR "neoplasm*" [Title/Abstract] | 2491389 | 09 November 2016 |
| #6  | #4 OR #5                                                                                                                                              | 3483410 | 09 November 2016 |
| #7  | #3 AND #6                                                                                                                                             | 18      | 09 November 2016 |
